# Supplementary material
Source: HighWire-hosted journal article supplement (http://www.cmajopen.ca/highwire/filestream/81008/field_highwire_adjunct_files/1/open-2016-0133-2-at.pdf)
Supplement: open-2016-0133-2-at.pdf [file open-2016-0133-2-at.pdf]

## Appendix 2 (as supplied by the authors): Survey questions

The following questions were included in a larger module of a biannual survey that had 59 questions in total:

“Do you plan to stop working completely or gradually?”

☐ Completely      ☐ Gradually

“I am satisfied with the amount of planning I have done for my own retirement”

1=Strongly Disagree, 2=Somewhat Disagree, 3=Neither Disagree nor Agree, 4=Somewhat Agree, 5=Strongly Agree

☐ 1      ☐ 2      ☐ 3      ☐ 4      ☐ 5
